# Supplementary material
Source: PubMed Central journal article supplement (PMC3518700)

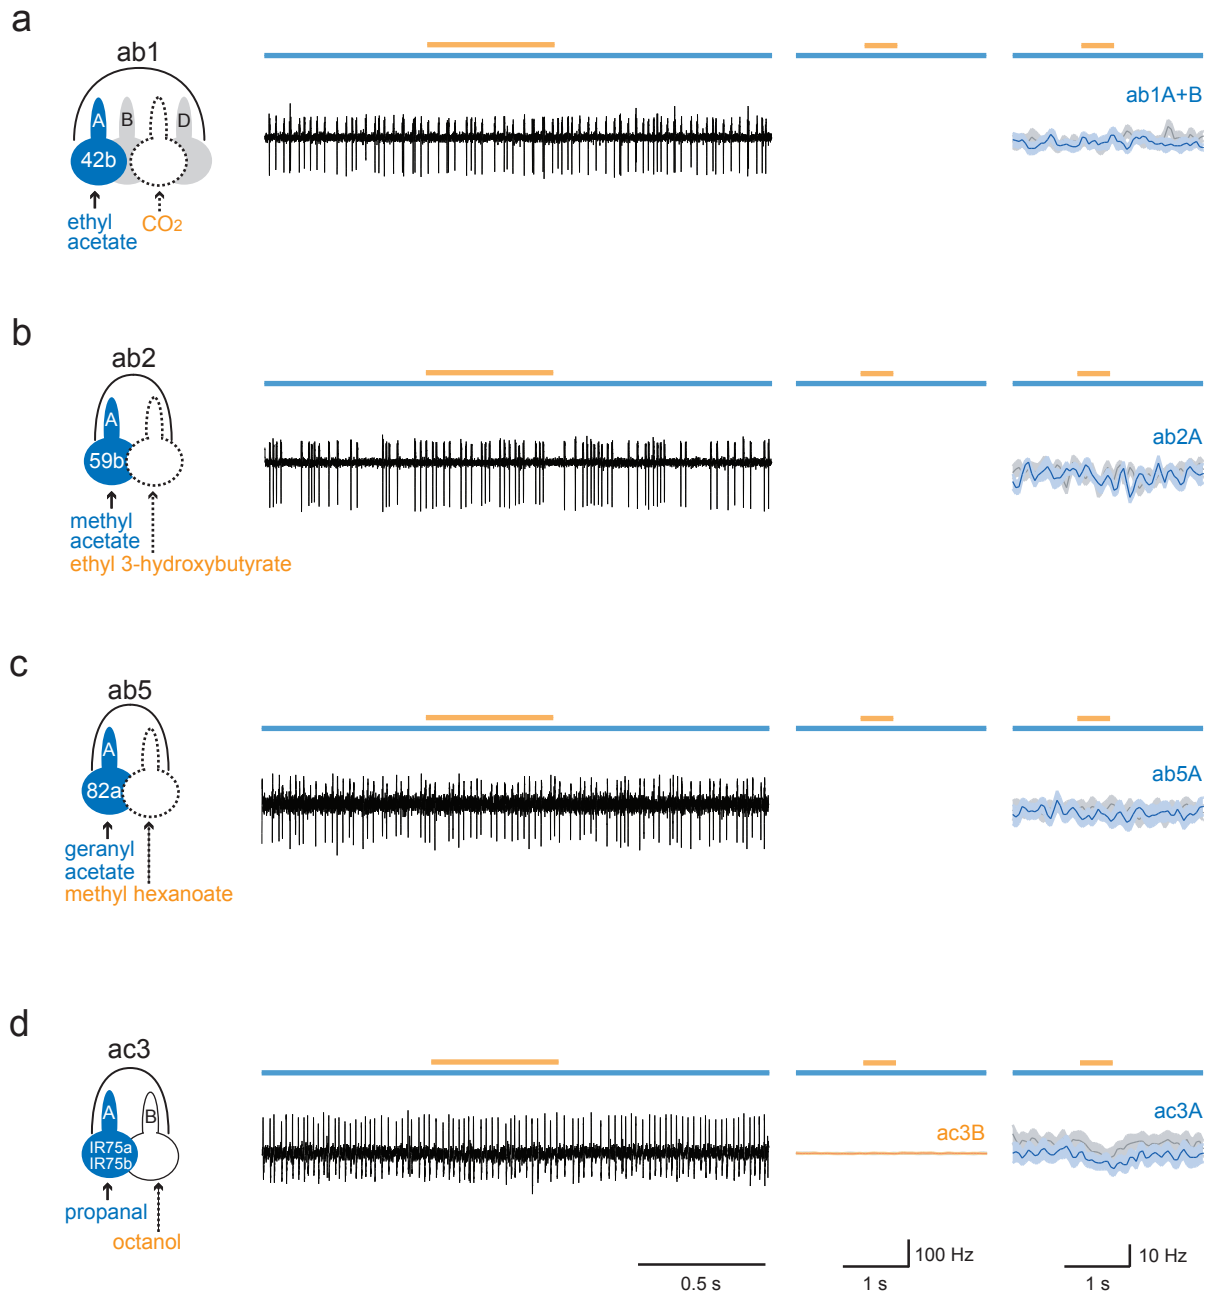

Figure S1 (Su et al)

Supplement: NIHMS417626-supplement-2.pdf [file NIHMS417626-supplement-2.pdf]

a

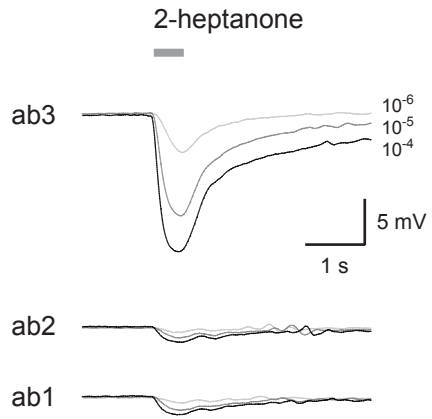

b

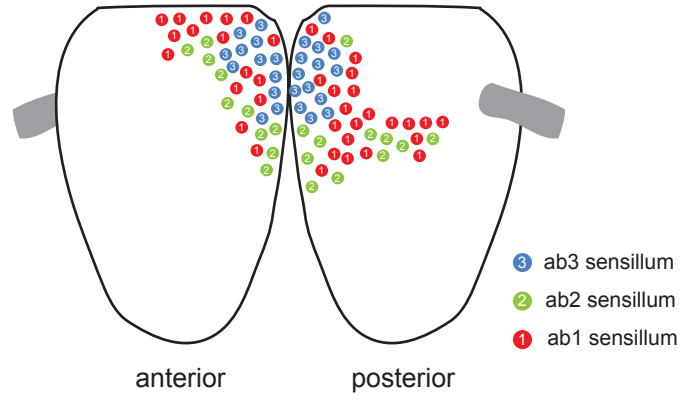

Figure S7 (Su et al)

Supplement: NIHMS417626-supplement-8.pdf [file NIHMS417626-supplement-8.pdf]
